# Supplementary material for: Non-invasive assessment of phosphate metabolism and oxidative capacity in working skeletal muscle in healthy young Chinese volunteers using 31P Magnetic Resonance Spectroscopy
Source: PeerJ. 2016 Jul 21;4:e2259. doi: 10.7717/peerj.2259 (PMC4963215; doi:10.7717/peerj.2259)
Supplement: Data S3 [file peerj-04-2259-s003.xls]

## Sheet: Sheet1
											aATP																	Pi
	Name	Sex	Age	Height	Weight	BMI	PS	MAX LOAD	LOAD	WE	pre1	pre2	aver	dur1	dur2	dur3	dur4	dur5	dur6	dur_aver	after1	after2	after3	after4	after5	after6	after_aver	pre1	pre2	aver												dur1	dur2	dur3	dur4	dur5	dur6	dur_aver
CW002-2		F		160	48		10				0.272	0.213	0.2425	0.276	0.275	0.33	0.257	0.217	0.127	0.247	0.384	0.295	0.343	0.343	0.357	0.316	0.339667	0.087	0.106	0.0965												0.116	0.129	0.122	0.136	0.158	0.201	0.143667
CW003-2		M		175	63		17				0.293	0.298	0.2955	0.352	0.579	0.363	0.425	0.325	0.298	0.390333	0.263	0.329	0.331	0.333	0.262	0.273	0.2985	0.146	0.134	0.14												0.273	0.26	0.23	0.199	0.204	0.238	0.234
CW004-2		M		180	70		15				0.304	0.335	0.3195	0.257	0.582	0.451	0.361	0.493	0.367	0.4185	0.45	0.297	0.296	0.325	0.327	0.361	0.342667	0.093	0.085	0.089												0.157	0.184	0.11		0.219	0.209	0.1758
CW005-2		M		168	50		15					0.241	0.241	0.392	0.358	0.26	0.458	0.321	0.492	0.380167	0.273	0.302	0.346	0.315	0.316	0.444	0.332667	0.147	0.116	0.1315												0.177	0.203	0.186	0.392	0.48		0.2876
CW006-2		M		173	60		7				0.288	0.268	0.278	0.244	0.358	0.593	0.311	0.348	0.334	0.364667	0.306	0.282	0.365	0.348	0.287	0.408	0.332667	0.035	0.124	0.0795												0.126	0.221	0.204	0.22	0.209	0.297	0.212833
CW007-2		F		155	42		11				0.258	0.211	0.2345	0.164	0.24	0.273	0.325	0.283	0.247	0.255333	0.238	0.304	0.202	0.202	0.25	0.251	0.241167	0.123	0.114	0.1185												0.196	0.186	0.235	0.136	0.303		0.2112
CW008-2		M		174	66		18				0.283	0.275	0.279	0.223	0.207	0.253	0.244	0.254	0.324	0.250833	0.285	0.203	0.273	0.256	0.207	0.31	0.255667	0.117	0.124	0.1205												0.272	0.284	0.277	0.291	0.25	0.275	0.274833
CW009-2		F		160	48		9				0.252	0.267	0.2595	0.245	0.254	0.489	0.369	0.41		0.3534	0.321	0.269	0.261	0.278	0.281	0.279	0.2815	0.07	0.086	0.078												0.26	0.249	0.287	0.249	0.27		0.263
CW010-2		M		181	83		15				0.206	0.332	0.269	0.42	0.28	0.192	0.274	0.313	0.305	0.297333	0.231	0.326	0.257	0.294	0.125	0.26	0.248833	0.093	0.026	0.0595												0.214	0.179	0.141	0.248	0.141	0.151	0.179
CW011-2		F		165	57		17				0.257	0.198	0.2275	0.223	0.352	0.36	0.422	0.31	0.354	0.336833	0.241	0.252	0.272	0.215	0.251	0.19	0.236833	0.137	0.086	0.1115												0.12	0.188	0.287	0.305	0.299	0.279	0.246333
CW012-2		M		165	63		16				0.313	0.342	0.3275	0.371	0.335	0.255	0.354	0.386	0.507	0.368	0.383	0.394	0.332	0.361	0.328	0.398	0.366	0.069	0.119	0.094												0.084	0.081	0.024	0.196	0.162		0.1094
CW013-2		M		182	80		25				0.103	0.227	0.165	0.281	0.285	0.231	0.223	0.263	0.347	0.271667	0.258	0.278	0.261	0.214	0.226	0.245	0.247	0.077		0.077												0.175	0.179	0.168	0.174	0.25	0.205	0.191833
CW014-2		F		165	55		20				0.116	0.207	0.1615	0.2	0.321	0.189	0.447	0.533	0.254	0.324	0.223	0.296	0.134	0.205	0.113	0.191	0.193667	0.047	0.111	0.079												0.387	0.3	0.588	0.598	0.517	0.595	0.4975
CW015-2		F		173	62		27				0.37	0.267	0.3185	0.401	0.263		0.264	0.39	0.322	0.328	0.247	0.304	0.296	0.301	0.349	0.262	0.293167	0.194	0.118	0.156												0.223	0.236	0.432	0.271	0.226	0.197	0.264167
CW016-2		M		175	70		28				0.347	0.271	0.309	0.361	0.313		0.412	0.304	0.312	0.3404	0.322	0.276	0.281	0.318	0.292	0.289	0.296333	0.057	0.183	0.12												0.091	0.126			0.212		0.143
CW017-2		F		162	49		20				0.359	0.255	0.307	0.271	0.32	0.298	0.192	0.523	0.247	0.3085	0.295	0.272	0.197	0.229	0.192	0.272	0.242833	0.099	0.088	0.0935												0.488	0.364	0.484	0.237	0.447	0.4	0.403333
CW018-2		M		165	56		28				0.292	0.342	0.317	0.227	0.197	0.534	0.322	0.216	0.231	0.287833	0.228	0.234	0.188	0.275	0.27	0.251	0.241	0.138	0.019	0.0785												0.192	0.147	0.173	0.294	0.154	0.277	0.206167
17		AVERAGE		169.294	60.1176		17.5294				0.269563	0.267588	0.267735	0.288706	0.324647	0.338067	0.332941	0.346412	0.31675	0.324871	0.291059	0.289	0.272647	0.283059	0.260765	0.294118	0.281775	0.101706	0.102437	0.101324												0.208882	0.206824	0.24675	0.263067	0.264765	0.277	0.237863
		SD		8.03714	11.3737		6.52991				0.0751443	0.0487135	0.0509215	0.0781959	0.107906	0.12569	0.082294	0.0979854	0.0929699	0.0514609	0.0643073	0.0415181	0.0635245	0.0539855	0.0709186	0.0717721	0.0484391	0.0420443	0.0393225	0.0264356												0.105701	0.0706543	0.146936	0.114689	0.114287	0.119103	0.0955886
80Nm	0.45m	200N	20Kg								aATP																	Pi/PCr			Pi			PCr/Pi															PCr/Pi
	Name	Sex	Age	Height	Weight	BMI	PS	MAX LOAD	LOAD	WE	pre1	pre2	aver	dur1	dur2	dur3	dur4	dur5	dur6	dur_aver	after1	after2	after3	after4	after5	after6	after_aver	pre1	pre2	aver	pre1	pre2	aver	pre1	pre2	aver	DIS1	DIS2	PH1	PH2	PH	dur1	dur2	dur3	dur4	dur5	dur6	dur_aver	dur1
CW003-2		M	22	175	63	20.5714	17	9.71429	2.42857	10.3785	0.293	0.298	0.2955	0.352	0.579	0.363	0.425	0.325	0.298	0.390333	0.263	0.329	0.331	0.333	0.262	0.273	0.2985	0.146	0.134	0.14	4.46111	6.88785	5.67448	6.84932	7.46269	7.156	4.826	4.867	7.0055	7.03791	7.0217	0.273	0.26	0.23	0.199	0.204	0.238	0.234	3.663
CW004-2		M	23	180	70	21.6049	26	14.8571	3.71429	21.1279	0.304	0.335	0.3195	0.257	0.582	0.451	0.361	0.493	0.367	0.4185	0.45	0.297	0.296	0.325	0.327	0.361	0.342667	0.093	0.085	0.089	2.79508	2.7994	2.79724	10.7527	11.7647	11.2587	4.795		6.98145		6.98145	0.157	0.184	0.11		0.219	0.209	0.1758	6.36943
CW005-2		M	21	168	50	17.7154	15	8.57143	2.14286	7.45082		0.241	0.241	0.392	0.358	0.26	0.458	0.321	0.492	0.380167	0.273	0.302	0.346	0.315	0.316	0.444	0.332667	0.147	0.116	0.1315				6.80272	8.62069	7.71171						0.177	0.203	0.186	0.392	0.48		0.2876	5.64972
CW006-2		M	24	173	60	20.0474	24	13.7143	3.42857	16.1092	0.288	0.268	0.278	0.244	0.358	0.593	0.311	0.348	0.334	0.364667	0.306	0.282	0.365	0.348	0.287	0.408	0.332667		0.124	0.124		5.59016	5.59016		8.06452	8.06452		4.835		7.01255	7.01255	0.126	0.221	0.204	0.22	0.209	0.297	0.212833	7.93651
CW008-2		M	23	174	66	21.7994	18	10.2857	2.57143	9.35632	0.283	0.275	0.279	0.223	0.207	0.253	0.244	0.254	0.324	0.250833	0.285	0.203	0.273	0.256	0.207	0.31	0.255667	0.117	0.124	0.1205	5.54741	8.74359	7.1455	8.54701	8.06452	8.30576	4.844	4.879	7.01963	7.04754	7.03358	0.272	0.284	0.277	0.291	0.25	0.275	0.274833	3.67647
CW010-2		M	25	181	83	25.335	15	8.57143	2.14286	11.9713	0.206	0.332	0.269	0.42	0.28	0.192	0.274	0.313	0.305	0.297333	0.231	0.326	0.257	0.294	0.125	0.26	0.248833	0.093		0.093				10.7527		10.7527						0.214	0.179	0.141	0.248	0.141	0.151	0.179	4.6729
CW012-2		M	24	165	63	23.1405	16	9.14286	2.28571	17.4816	0.313	0.342	0.3275	0.371	0.335	0.255	0.354	0.386	0.507	0.368	0.383	0.394	0.332	0.361	0.328	0.398	0.366	0.069	0.119	0.094	1.74083	2.618	2.17941	14.4928	8.40336	11.4481		4.832		7.01019	7.01019	0.084	0.081		0.196	0.162		0.13075	11.9048
CW013-2		M	23	182	80	24.1517	25	14.2857	3.57143	18.6174	0.103	0.227	0.165	0.281	0.285	0.231	0.223	0.263	0.347	0.271667	0.258	0.278	0.261	0.214	0.226	0.245	0.247	0.077		0.077	6.05		6.05	12.987		12.987						0.175	0.179	0.168	0.174	0.25	0.205	0.191833	5.71429
CW016-2		M	23	175	70	22.8571	28	16	4	27.972	0.347	0.271	0.309	0.361	0.313		0.412	0.304	0.312	0.3404	0.322	0.276	0.281	0.318	0.292	0.289	0.296333		0.183	0.183		7.03846	7.03846		5.46448							0.091	0.126			0.212		0.143	10.989
CW018-2		M	25	165	56	20.5693	28	16	4	19.4018	0.292	0.342	0.317	0.227	0.197	0.534	0.322	0.216	0.231	0.287833	0.228	0.234	0.188	0.275	0.27	0.251	0.241	0.138		0.138	4.51786		4.51786	7.24638		7.24638						0.192	0.147	0.173	0.294	0.154	0.277	0.206167	5.20833
10		AVERAGE	23.3	173.8	66.1	21.7792	21.2	12.1143	3.02857	15.9867	0.269889	0.2931	0.28005	0.3128	0.3494	0.348	0.3384	0.3223	0.3517	0.336973	0.2999	0.2921	0.293	0.3039	0.264	0.3239	0.296133	0.11	0.126429	0.119	4.18538	5.61291	5.12414	9.80382	8.26357	9.43676	4.82167	4.85325	7.00219	7.02705	7.01189	0.1761	0.1864	0.186125	0.25175	0.2281	0.236	0.203582	6.57844
		SD	1.25167	6.23253	10.1483	2.20489	5.47317	3.12752	0.781881	6.28323	0.0728225	0.0429533	0.0484639	0.0740087	0.133735	0.145301	0.0784364	0.0772932	0.0858604	0.056541	0.0698736	0.0525895	0.0525526	0.0448812	0.0633649	0.0730212	0.0460076	0.031273	0.0292965	0.0317044	1.63874	2.46352	1.83542	2.92221	1.86907	2.17481	0.0247857	0.0233577	0.0193069	0.0185464	0.0193456	0.0657241	0.0604064	0.0518719	0.0716674	0.0961173	0.0513842	0.0512533	2.86259
											aATP																	Pi/PCr			Pi			PCr/Pi															PCr/Pi
	Name	Sex	Age	Height	Weight	BMI	PS	MAX LOAD	LOAD	WE	pre1	pre2	aver	dur1	dur2	dur3	dur4	dur5	dur6	dur_aver	after1	after2	after3	after4	after5	after6	after_aver	pre1	pre2	aver	pre1	pre2	aver	pre1	pre2	aver	DIS1	DIS2	PH1	PH2	PH	dur1	dur2	dur3	dur4	dur5	dur6	dur_aver	dur1
CW002-2		F	22	160	48	18.75	10	5.71429	1.42857	8.91001	0.272	0.213	0.2425	0.276	0.275	0.33	0.257	0.217	0.127	0.247	0.384	0.295	0.343	0.343	0.357	0.316	0.339667	0.087	0.106	0.0965	4.35	4.31852	4.33426	11.4943	9.43396	10.4641	4.785	4.774	6.97376	6.96535	6.96956	0.216	0.129	0.122	0.136	0.158	0.201	0.160333	4.62963
CW007-2		F	24	155	52	21.6441	11	6.28571	1.57143	7.44048	0.258	0.211	0.2345	0.164	0.24	0.273	0.325	0.283	0.247	0.255333	0.238	0.304	0.202	0.202	0.25	0.251	0.241167	0.123	0.114	0.1185	5.59091	5.91509	5.753	8.13008	8.77193	8.45101	4.778		6.96841		6.96841	0.196	0.186	0.235	0.136	0.303		0.2112	5.10204
CW009-2		F	23	160	48	18.75	9	5.14286	1.28571	4.88865	0.252	0.267	0.2595	0.245	0.254	0.489	0.369	0.41		0.3534	0.321	0.269	0.261	0.278	0.281	0.279	0.2815	0.07	0.086	0.078	5.66176	3.69531	4.67854	14.2857	11.6279	12.9568	4.834	4.834	7.01176	7.01176	7.01176	0.26	0.249	0.287	0.249	0.27		0.263	3.84615
CW011-2		F	24	165	57	20.9366	17	9.71429	2.42857	9.85888	0.257	0.198	0.2275	0.223	0.352	0.36	0.422	0.31	0.354	0.336833	0.241	0.252	0.272	0.215	0.251	0.19	0.236833	0.137	0.086	0.1115	6.55217		6.55217	7.29927	11.6279	9.46359	4.813	4.846	6.99537	7.02121	7.00829	0.12	0.188	0.287	0.305	0.299	0.279	0.246333	8.33333
CW014-2		F	24	165	55	20.202	20	11.4286	2.85714	5.743	0.116	0.207	0.1615	0.2	0.321	0.189	0.447	0.533	0.254	0.324	0.223	0.296	0.134	0.205	0.113	0.191	0.193667		0.111	0.111					9.00901	9.00901						0.387	0.3	0.588	0.598	0.517	0.595	0.4975	2.58398
CW015-2		F	24	173	62	20.7157	20	11.4286	2.85714	10.8157	0.37	0.267	0.3185	0.401	0.263		0.264	0.39	0.322	0.328	0.247	0.304	0.296	0.301	0.349	0.262	0.293167	0.194	0.118	0.156		4.24183	4.24183	5.15464	8.47458	6.81461	4.862	4.822	7.03391	7.00237	7.01814	0.223	0.236	0.432	0.271	0.226	0.197	0.264167	4.4843
CW017-2		F	24	162	50	19.052	20	11.4286	2.85714	7.08383	0.359	0.255	0.307	0.271	0.32	0.298	0.192	0.523	0.247	0.3085	0.295	0.272	0.197	0.229	0.192	0.272	0.242833	0.099	0.088	0.0935				10.101	11.3636	10.7323						0.488	0.364	0.484	0.237	0.447	0.4	0.403333	2.04918
7		AVERAGE	23.5714	162.857	53.1429	20.0072	15.2857	8.73469	2.18367	7.82007	0.269143	0.231143	0.250143	0.254286	0.289286	0.323167	0.325143	0.380857	0.2585	0.307581	0.278429	0.284571	0.243571	0.253286	0.256143	0.251571	0.261262	0.118333	0.101286	0.109286	5.53871	4.54269	5.11196	9.41083	10.0441	9.69878	4.8144	4.819	6.99664	7.00018	6.99523	0.27	0.236	0.347857	0.276	0.317143	0.3344	0.292267	4.43266
		SD	0.786796	5.63999	5.17779	1.16596	5.08967	2.90838	0.727096	2.15685	0.0839373	0.0304326	0.0527041	0.0757622	0.0417361	0.100055	0.0933299	0.119534	0.0783958	0.0409111	0.0582061	0.0202308	0.0702967	0.0547014	0.0857135	0.0463496	0.0474062	0.0442433	0.0141506	0.0247199	0.905172	0.956088	1.00436	3.24948	1.43083	1.94402	0.0347894	0.0315595	0.027111	0.0244565	0.0242251	0.125442	0.0784241	0.160436	0.155991	0.124627	0.167302	0.0704042	2.04725
																																			P	0.806												P	0.111
																																																	6.57844
								pre	during	post																																							4.43266
		0.250143	0.307581	0.261262		aATP	F	0.250143	0.307581	0.261262	M	0.250143	0.307581	0.261262			Pi/PCr	F								pH	F			M									ATP/PCr	F			M				Aatp/PCr	F
		0.1058	0.141469	0.116548		bATP		0.1058	0.141469	0.116548		0.1058	0.141469	0.116548				0.104714	0.292267	0.109881		0.104714	0.292267	0.109881			6.99523	7.03232	6.9618	7.01189	7.04224	6.98258								0.557357	0.6864	0.568881	0.66275	0.829341	0.650283			0.250143
		0.221643	0.250543	0.228807		gATP		0.221643	0.250543	0.228807		0.221643	0.250543	0.228807				0.0271859	0.11704	0.0286868		0.09895	0.201447	0.102183			0.0242251	0.0171707	0.0175518	0.0193456	0.0262982	0.0263943								0.0886067	0.0731611	0.0828327	0.153458	0.144082	0.116163			0.0527041
						ATP		0.557357	0.6864	0.568881		0.66275	0.829341	0.650283				M									pre-exercise	end-exercise		sd
		0.250143	0.307581	0.261262			SD	0.0886067	0.0731611	0.0828327	SD	0.153458	0.144082	0.116163				0.09895	0.201447	0.102183		0.0271859	0.0704042	0.0286868		M	7.01189	6.99673		0.0193456	0.0163901									0.557357	0.6864	0.568881	0.0886067	0.0731611	0.0828327			0.250143
		0.1058	0.141469	0.116548				F	M	F	M	F	M					0.0271011	0.0549366	0.0268752		0.0271011	0.0549366	0.0268752		F	6.99523	6.96813		0.0242251	0.0280739									0.66275	0.829341	0.650283	0.153458	0.144082	0.116163			0.28005
		0.221643	0.250543	0.228807		aATP		0.250143	0.28005	0.307581	0.336973	0.261262	0.296133					Pre	During	Post																				Pre	During	Post						Pre
						bATP		0.1058	0.138611	0.141469	0.170957	0.116548	0.127833
						gATP		0.221643	0.24995	0.250543	0.297717	0.228807	0.247957
								0.557357	0.66275	0.6864	0.829341	0.568881	0.650283
								0.0886067	0.153458	0.0731611	0.144082	0.0828327	0.116163
																																			PCr/Pi
																																			Pre	During						Post
																																		M	9.43676	6.57844	6.05112	5.76901	4.2301	4.88117	4.44292	6.94089	8.8153	9.15382	8.87728	9.28824	9.3122
																																		F	9.69878	4.43266	4.17157	4.51176	2.88426	3.61054	3.56323	6.4319	8.82014	8.93846	9.22575	9.63449	9.82225
																																		Time(sec)	0	50	100	150	200	250	300	350	400	450	500	550	600
																																	SD	M	2.17481	2.86259	2.56927	1.70739	1.06693	1.44042	1.1267	1.67633	0.713038	1.57048	0.554898	1.442	2.13388
																																		F	1.94402	1.65911	2.04725	2.11086	2.20548	1.46774	1.49644	1.11727	2.85325	2.76804	2.19464	2.69753	2.31489
																																	SD	M	1.08741	1.43129	1.28463	0.853693	0.533464	0.720212	0.563349	0.838165	0.356519	0.785241	0.277449	0.721	1.06694
																																		F	0.972008	0.829557	1.02362	1.05543	1.10274	0.73387	0.748218	0.558634	1.42663	1.38402	1.09732	1.34877	1.15745
																																								Parameters		Male	Female	t	P
																																								PCr/Pi	Pre-exercise
																																									During-exercise
																																									End-exercise
																																									P
																																								PCr/ATP	Pre-exercise
																																									During-exercise
																																									End-exercise
																																									P
																																								PCr(mmol/kg)	Pre-exercise
																																									End-exercise
																																									P
																																									End-exercise change in PCr (% rest)
																																								Pi(mmol/kg)	Pre-exercise
																																									End-exercise
																																									P
																																								ATP(mmol/kg)	Pre-exercise
																																									End-exercise
																																									P
																																								pH	Pre-exercise
																																									End-exercise
																																									P
																																								kPCr(s-1)
																																								Oxidative capacity (mM ATP S-1)
[truncated: 148 more columns]
